# Supplementary material
Source: Springer Nature journal article supplement (https://www.springermedizin.de/resource/supplementary/12885_2012_5265_MOESM3_ESM.pdf/9465442)

1

2

3

4

5

A

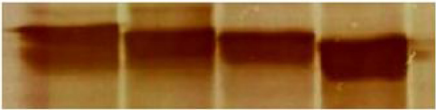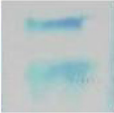

→ 62 kDa

→ 47.5 kDa

1

2

3

B

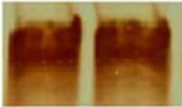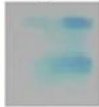

→ 62 kDa

→ 47.5 kDa

Supplement: MOESM3 [file 9465442]
